# Supplementary material for: Changes in Child Undernutrition and Overweight in India from 2006 to 2019: An Analysis of 22 States
Source: Research Square preprint supplement (doi:10.21203/rs.3.rs-537129/v1), 2021-05-26
Supplement: Supplementary file 1 [file 6c3dca4c16838d100d513927.xlsx]

## Sheet: NFHS-3 State
region	stunting	underweight	wasting	overweight	state_name
1	35.0 (31.1, 38.9)	25.6 (22.3, 28.8)	14.8 (12.5, 17.2)	2.3 (1.3, 3.3)	Jammu and Kashmir
2	38.6 (34.6, 42.7)	36.5 (32.5, 40.6)	19.3 (15.9, 22.7)	1.1 (0.4, 1.8)	Himachal Pradesh
10	55.6 (52.2, 58.9)	55.9 (52.7, 59.2)	27.1 (24.9, 29.3)	0.3 (0.1, 0.5)	Bihar
11	38.3 (32.8, 43.8)	19.7 (15.0, 24.3)	9.7 (6.3, 13.1)	8.3 (5.2, 11.4)	Sikkim
13	38.8 (35.5, 42.1)	25.2 (22.2, 28.1)	13.3 (11.0, 15.7)	4.7 (3.5, 5.9)	Nagaland
14	35.6 (32.7, 38.5)	22.1 (19.6, 24.7)	9.0 (7.4, 10.6)	2.2 (1.3, 3.1)	Manipur
15	39.8 (33.8, 45.7)	19.9 (16.4, 23.4)	9.0 (6.5, 11.4)	4.3 (2.5, 6.0)	Mizoram
16	35.7 (31.6, 39.7)	39.6 (34.6, 44.5)	24.6 (20.7, 28.5)	2.2 (0.4, 4.0)	Tripura
17	55.1 (49.4, 60.9)	48.8 (43.2, 54.3)	30.7 (24.7, 36.7)	2.6 (1.2, 4.0)	Meghalaya
18	46.5 (42.2, 50.8)	36.4 (32.2, 40.7)	13.7 (11.5, 15.9)	1.2 (0.5, 1.9)	Assam
19	44.6 (41.3, 47.9)	38.7 (35.4, 42.0)	16.9 (14.6, 19.2)	1.9 (1.1, 2.6)	West Bengal
24	51.7 (48.1, 55.2)	44.6 (41.0, 48.2)	18.7 (16.6, 20.7)	1.2 (0.6, 1.8)	Gujarat
27	46.3 (42.9, 49.6)	37.0 (33.8, 40.2)	16.5 (14.6, 18.4)	2.8 (1.7, 3.9)	Maharashtra
28	42.7 (39.4, 46.0)	32.5 (29.4, 35.6)	12.2 (10.2, 14.2)	2.2 (1.1, 3.3)	Andhra Pradesh
29	43.7 (40.1, 47.4)	37.6 (34.3, 40.8)	17.6 (15.4, 19.8)	2.6 (1.8, 3.4)	Karnataka
30	25.6 (21.7, 29.4)	25.0 (21.2, 28.9)	14.1 (11.5, 16.8)	4.3 (2.4, 6.1)	Goa
32	24.5 (21.3, 27.8)	22.9 (19.6, 26.3)	15.9 (13.0, 18.8)	1.2 (0.5, 1.9)	Kerala

## Sheet: NFHS-4 State
region	stunting	underweight	wasting	overweight	state_name
1	23.3 (18.0, 28.5)	21.5 (16.6, 26.5)	18.9 (13.8, 24.1)	3.0 (1.2, 4.7)	Andaman and Nicobar Islands
2	31.4 (29.2, 33.5)	31.9 (29.7, 34.0)	17.2 (15.6, 18.7)	1.2 (0.8, 1.7)	Andhra Pradesh
4	36.4 (35.1, 37.7)	29.8 (28.5, 31.2)	17.0 (15.9, 18.2)	2.3 (1.9, 2.7)	Assam
5	48.3 (47.4, 49.2)	43.9 (43.0, 44.7)	20.8 (20.1, 21.5)	1.2 (1.0, 1.4)	Bihar
8	37.1 (31.6, 42.7)	35.8 (31.7, 39.9)	26.7 (22.9, 30.6)	3.9 (1.6, 6.2)	Dadra and Nagar Haveli
10	20.1 (15.5, 24.6)	23.8 (19.2, 28.4)	21.9 (16.5, 27.3)	3.7 (0.8, 6.6)	Goa
11	38.5 (37.0, 39.9)	39.3 (37.7, 40.9)	26.4 (25.0, 27.9)	1.9 (1.5, 2.4)	Gujarat
13	26.3 (23.7, 28.8)	21.2 (18.8, 23.6)	13.7 (12.0, 15.5)	1.9 (1.3, 2.5)	Himachal Pradesh
14	27.4 (25.8, 28.9)	16.5 (15.1, 18.0)	12.2 (10.9, 13.5)	5.7 (4.8, 6.5)	Jammu and Kashmir
16	36.2 (34.4, 37.9)	35.2 (33.4, 37.0)	26.1 (24.3, 27.8)	2.6 (2.0, 3.1)	Karnataka
17	19.7 (17.7, 21.7)	16.1 (14.4, 17.8)	15.7 (13.9, 17.6)	3.4 (2.4, 4.4)	Kerala
18	26.8 (22.1, 31.6)	23.6 (18.8, 28.3)	13.7 (10.2, 17.3)	1.6 (0.3, 3.0)	Lakshadweep
20	34.4 (32.9, 36.0)	36.0 (34.4, 37.5)	25.6 (24.1, 27.0)	1.9 (1.5, 2.3)	Maharashtra
21	28.9 (27.2, 30.6)	13.8 (12.5, 15.1)	6.8 (6.0, 7.6)	3.1 (2.5, 3.6)	Manipur
22	43.8 (41.6, 46.0)	28.9 (27.0, 30.8)	15.3 (13.7, 16.9)	3.9 (3.1, 4.6)	Meghalaya
23	28.1 (25.5, 30.7)	12.0 (10.4, 13.7)	6.1 (5.1, 7.1)	4.2 (3.0, 5.3)	Mizoram
24	28.6 (26.7, 30.5)	16.7 (15.1, 18.4)	11.3 (9.8, 12.7)	3.8 (3.0, 4.5)	Nagaland
30	29.6 (26.0, 33.2)	14.2 (11.2, 17.2)	14.2 (11.1, 17.2)	8.6 (6.3, 10.8)	Sikkim
32	24.3 (21.4, 27.2)	24.1 (21.2, 27.1)	16.8 (14.4, 19.3)	3.0 (1.8, 4.1)	Tripura
35	32.5 (30.8, 34.2)	31.5 (29.9, 33.2)	20.3 (18.9, 21.7)	2.1 (1.6, 2.6)	West Bengal
36	28.0 (25.3, 30.7)	28.3 (25.6, 31.1)	18.0 (16.1, 20.0)	0.7 (-0.1, 1.5)	Telangana
37	30.9 (26.7, 35.2)	18.7 (14.7, 22.7)	9.3 (6.4, 12.3)	4.0 (2.3, 5.7)	Ladakh?

## Sheet: NFHS-4 District
region	district	stunting	underweight	wasting	overweight	nfhs5_state	nfhs4_district
1	638	20.3 (14.4, 26.1)	10.5 (6.8, 14.1)	7.4 (4.3, 10.6)	4.8 (1.3, 8.2)	Andaman & Nicobar Islands	Nicobar
1	639	32.5 (22.9, 42.1)	33.5 (24.8, 42.2)	31.7 (21.1, 42.2)	2.1 (0.1, 4.1)	Andaman & Nicobar Islands	North & Middle Andamans
1	640	20.1 (13.0, 27.2)	18.5 (11.4, 25.5)	15.6 (9.0, 22.3)	3.0 (0.5, 5.6)	Andaman & Nicobar Islands	South Andaman
2	542	28.0 (21.6, 34.3)	28.7 (20.7, 36.7)	15.6 (10.5, 20.6)	1.0 (-0.4, 2.4)	Andhra Pradesh	Srikakulam
2	543	36.8 (30.1, 43.5)	34.4 (27.3, 41.4)	18.8 (12.0, 25.6)	0.5 (-0.5, 1.4)	Andhra Pradesh	Vizianagaram
2	544	30.1 (24.2, 35.9)	33.1 (25.1, 41.1)	17.2 (10.6, 23.8)	0.0 (0.0, 0.0)	Andhra Pradesh	Visakhapatnam
2	545	27.7 (21.3, 34.1)	27.1 (19.0, 35.3)	15.3 (9.3, 21.3)	2.6 (0.5, 4.8)	Andhra Pradesh	East Godavari
2	546	28.5 (20.8, 36.3)	30.1 (22.3, 37.9)	14.7 (9.2, 20.2)	0.6 (-0.6, 1.9)	Andhra Pradesh	West Godavari
2	547	22.6 (18.3, 26.8)	27.7 (22.2, 33.1)	20.7 (15.0, 26.3)	1.8 (-0.1, 3.8)	Andhra Pradesh	Krishna
2	548	22.1 (13.6, 30.6)	29.1 (20.5, 37.7)	17.9 (11.8, 23.9)	3.9 (0.8, 7.0)	Andhra Pradesh	Guntur
2	549	28.2 (21.3, 35.1)	30.3 (24.6, 35.9)	15.3 (11.5, 19.2)	0.8 (-0.3, 2.0)	Andhra Pradesh	Prakasam
2	550	29.4 (22.5, 36.4)	28.7 (18.6, 38.8)	16.9 (10.4, 23.4)	1.5 (-0.2, 3.2)	Andhra Pradesh	Sri Potti Sriramulu Nellore
2	551	36.3 (29.5, 43.0)	34.4 (25.7, 43.2)	17.9 (11.8, 24.0)	1.4 (-0.1, 2.9)	Andhra Pradesh	Y.S.R. Cuddapah
2	552	44.1 (36.6, 51.7)	37.5 (31.6, 43.4)	18.7 (15.2, 22.3)	0.6 (-0.2, 1.3)	Andhra Pradesh	Kurnool
2	553	40.3 (30.5, 50.0)	39.3 (30.8, 47.7)	15.2 (9.7, 20.7)	0.5 (-0.5, 1.6)	Andhra Pradesh	Anantapur
2	554	31.4 (22.9, 39.9)	32.4 (24.5, 40.3)	18.1 (12.1, 24.1)	0.0 (0.0, 0.0)	Andhra Pradesh	Chittoor
4	300	30.6 (24.4, 36.9)	27.1 (20.5, 33.8)	15.7 (11.2, 20.1)	1.4 (0.1, 2.7)	Assam	Kokrajhar
4	301	47.4 (41.7, 53.1)	39.0 (33.3, 44.8)	22.2 (16.5, 28.0)	5.0 (2.3, 7.8)	Assam	Dhubri
4	302	42.7 (35.9, 49.5)	39.5 (32.2, 46.9)	22.1 (14.5, 29.7)	2.6 (0.4, 4.7)	Assam	Goalpara
4	303	41.7 (37.0, 46.4)	33.1 (27.7, 38.4)	16.6 (13.1, 20.2)	1.9 (0.3, 3.5)	Assam	Barpeta
4	304	38.4 (31.4, 45.5)	25.8 (20.1, 31.5)	10.3 (7.2, 13.4)	1.0 (-0.2, 2.2)	Assam	Morigaon
4	305	38.4 (32.8, 44.0)	31.3 (25.7, 36.8)	13.2 (9.5, 17.0)	0.3 (-0.3, 0.8)	Assam	Nagaon
4	306	28.7 (21.7, 35.7)	26.9 (19.8, 34.0)	21.5 (12.8, 30.3)	2.3 (0.6, 4.1)	Assam	Sonitpur
4	307	29.3 (22.4, 36.1)	24.2 (17.0, 31.3)	11.2 (6.1, 16.3)	0.8 (-0.3, 1.9)	Assam	Lakhimpur
4	308	35.5 (29.5, 41.5)	15.8 (13.0, 18.6)	6.2 (4.0, 8.3)	0.5 (-0.2, 1.2)	Assam	Dhemaji
4	309	36.0 (29.3, 42.6)	32.7 (25.9, 39.6)	14.8 (10.7, 18.8)	2.8 (-0.5, 6.2)	Assam	Tinsukia
4	310	33.3 (27.7, 38.9)	33.0 (25.2, 40.9)	22.4 (16.1, 28.6)	3.3 (1.2, 5.4)	Assam	Dibrugarh
4	311	35.5 (29.1, 41.8)	22.2 (15.3, 29.1)	8.3 (5.3, 11.2)	3.2 (1.1, 5.4)	Assam	Sivasagar
4	312	25.5 (20.0, 30.9)	18.1 (13.2, 22.9)	14.8 (9.8, 19.8)	1.6 (0.0, 3.1)	Assam	Jorhat
4	313	32.6 (25.6, 39.6)	20.2 (15.0, 25.5)	13.9 (8.5, 19.2)	3.7 (0.5, 6.8)	Assam	Golaghat
4	314	28.1 (22.5, 33.7)	23.7 (18.2, 29.1)	18.7 (13.0, 24.5)	0.7 (-0.1, 1.4)	Assam	Karbi Anglong
4	315	34.7 (29.4, 40.0)	18.2 (13.7, 22.7)	6.3 (3.2, 9.4)	1.5 (0.3, 2.6)	Assam	Dima Hasao
4	316	36.3 (30.6, 42.0)	36.3 (29.7, 42.8)	30.6 (23.3, 37.8)	4.0 (1.6, 6.4)	Assam	Cachar
4	317	42.3 (37.2, 47.3)	35.6 (30.6, 40.5)	17.6 (12.9, 22.3)	1.8 (0.7, 2.9)	Assam	Karimganj
4	318	38.0 (31.2, 44.9)	32.5 (26.8, 38.1)	19.1 (14.9, 23.2)	1.6 (0.0, 3.2)	Assam	Hailakandi
4	319	39.1 (32.1, 46.0)	32.9 (26.6, 39.3)	23.6 (17.3, 30.0)	6.1 (3.8, 8.5)	Assam	Bongaigaon
4	320	40.1 (32.8, 47.4)	24.7 (17.5, 31.9)	12.9 (8.7, 17.2)	2.5 (1.0, 4.1)	Assam	Chirang
4	321	33.3 (26.0, 40.6)	29.6 (22.2, 37.0)	18.8 (12.7, 24.9)	0.7 (-0.2, 1.5)	Assam	Kamrup
4	322	24.6 (18.3, 31.0)	23.1 (16.0, 30.3)	11.0 (7.1, 14.9)	2.0 (-0.4, 4.4)	Assam	Kamrup Metropolitan
4	323	26.8 (21.7, 31.9)	20.0 (14.5, 25.5)	15.3 (9.8, 20.7)	1.8 (-0.0, 3.5)	Assam	Nalbari
4	324	32.4 (26.5, 38.3)	22.4 (18.8, 26.0)	10.5 (6.4, 14.6)	2.2 (0.4, 4.1)	Assam	Baksa
4	325	43.5 (35.9, 51.0)	37.9 (30.7, 45.1)	19.2 (15.3, 23.1)	3.0 (1.2, 4.8)	Assam	Darrang
4	326	39.1 (32.4, 45.8)	31.8 (26.5, 37.0)	18.3 (12.9, 23.7)	4.0 (2.0, 6.0)	Assam	Udalguri
5	203	43.6 (39.0, 48.3)	39.1 (34.2, 43.9)	21.7 (17.2, 26.2)	1.2 (0.1, 2.4)	Bihar	Pashchim Champaran
5	204	47.2 (42.4, 51.9)	40.8 (36.2, 45.4)	18.0 (15.0, 21.0)	0.8 (0.1, 1.5)	Bihar	Purba Champaran
5	205	53.0 (48.6, 57.3)	42.8 (37.5, 48.1)	14.8 (11.8, 17.8)	0.8 (0.1, 1.6)	Bihar	Sheohar
5	206	57.3 (52.4, 62.3)	47.7 (44.1, 51.3)	15.8 (13.5, 18.1)	1.0 (0.1, 1.8)	Bihar	Sitamarhi
5	207	51.8 (46.0, 57.6)	45.4 (41.1, 49.7)	19.1 (15.0, 23.3)	2.1 (0.7, 3.5)	Bihar	Madhubani
5	208	48.1 (43.5, 52.8)	43.4 (38.7, 48.0)	20.9 (18.1, 23.8)	1.7 (0.0, 3.3)	Bihar	Supaul
5	209	48.4 (44.3, 52.5)	45.4 (41.0, 49.8)	22.8 (18.8, 26.7)	0.5 (-0.1, 1.0)	Bihar	Araria
5	210	46.9 (42.1, 51.6)	45.4 (41.3, 49.4)	22.8 (19.1, 26.6)	1.4 (0.6, 2.3)	Bihar	Kishanganj
5	211	52.0 (47.9, 56.2)	47.0 (42.0, 52.1)	20.8 (17.6, 24.0)	2.1 (0.9, 3.2)	Bihar	Purnia
5	212	49.2 (44.3, 54.0)	45.1 (40.8, 49.3)	20.7 (17.3, 24.0)	1.2 (0.4, 2.0)	Bihar	Katihar
5	213	51.8 (47.3, 56.3)	49.2 (44.8, 53.7)	24.2 (20.0, 28.5)	1.6 (0.7, 2.5)	Bihar	Madhepura
5	214	43.9 (39.7, 48.1)	44.4 (39.2, 49.6)	23.9 (18.8, 29.1)	0.9 (0.2, 1.7)	Bihar	Saharsa
5	215	49.0 (42.4, 55.7)	41.1 (36.1, 46.1)	16.6 (12.7, 20.6)	2.0 (0.3, 3.8)	Bihar	Darbhanga
5	216	47.9 (43.0, 52.8)	42.3 (37.0, 47.6)	17.5 (13.9, 21.1)	0.4 (-0.1, 0.9)	Bihar	Muzaffarpur
5	217	35.6 (31.5, 39.8)	30.5 (26.1, 34.9)	16.5 (12.6, 20.4)	1.0 (0.0, 1.9)	Bihar	Gopalganj
5	218	37.9 (32.5, 43.2)	31.6 (26.4, 36.9)	15.0 (12.1, 17.9)	1.9 (0.7, 3.0)	Bihar	Siwan
5	219	46.1 (40.9, 51.2)	40.4 (35.3, 45.4)	18.1 (14.2, 21.9)	1.5 (0.6, 2.5)	Bihar	Saran
5	220	53.7 (49.1, 58.3)	41.3 (36.9, 45.7)	15.1 (11.6, 18.5)	1.1 (0.2, 2.0)	Bihar	Vaishali
5	221	49.2 (43.2, 55.2)	41.3 (36.0, 46.5)	18.4 (14.9, 21.9)	0.7 (0.0, 1.3)	Bihar	Samastipur
5	222	44.9 (40.0, 49.8)	39.1 (34.1, 44.0)	18.4 (15.6, 21.3)	1.1 (0.1, 2.1)	Bihar	Begusarai
5	223	49.8 (45.2, 54.4)	42.4 (37.4, 47.4)	17.0 (13.8, 20.2)	1.7 (0.6, 2.9)	Bihar	Khagaria
5	224	46.6 (41.2, 52.1)	40.8 (35.8, 45.7)	23.0 (18.4, 27.7)	1.4 (0.5, 2.3)	Bihar	Bhagalpur
5	225	49.6 (45.0, 54.2)	48.5 (44.8, 52.1)	26.0 (22.3, 29.7)	1.3 (0.1, 2.4)	Bihar	Banka
5	226	46.6 (41.9, 51.3)	43.6 (38.5, 48.8)	21.5 (16.7, 26.2)	1.6 (0.6, 2.6)	Bihar	Munger
5	227	50.6 (44.9, 56.2)	47.3 (42.6, 52.0)	20.1 (16.1, 24.1)	1.1 (0.3, 1.8)	Bihar	Lakhisarai
5	228	46.4 (40.6, 52.1)	51.7 (45.4, 58.0)	28.9 (23.9, 33.9)	0.8 (0.2, 1.4)	Bihar	Sheikhpura
5	229	54.1 (49.2, 59.1)	50.2 (44.4, 56.0)	24.3 (19.9, 28.7)	0.5 (-0.0, 1.1)	Bihar	Nalanda
5	230	43.5 (39.5, 47.6)	43.3 (39.9, 46.7)	28.5 (24.4, 32.5)	0.9 (0.2, 1.5)	Bihar	Patna
5	231	43.5 (38.5, 48.4)	47.2 (42.0, 52.4)	26.0 (20.5, 31.6)	0.8 (0.0, 1.5)	Bihar	Bhojpur
5	232	43.9 (37.1, 50.6)	41.2 (35.4, 46.9)	19.6 (15.7, 23.6)	1.2 (0.2, 2.2)	Bihar	Buxar
5	233	53.8 (49.3, 58.3)	48.1 (43.9, 52.3)	21.4 (17.5, 25.4)	1.6 (0.3, 2.8)	Bihar	Kaimur
5	234	48.5 (43.3, 53.7)	45.1 (39.6, 50.5)	19.9 (16.5, 23.2)	0.9 (0.3, 1.6)	Bihar	Rohtas
5	235	48.3 (42.9, 53.8)	47.6 (43.0, 52.1)	24.8 (20.7, 28.8)	1.0 (0.0, 2.0)	Bihar	Aurangabad
5	236	52.9 (47.4, 58.4)	53.1 (48.2, 58.0)	25.6 (22.5, 28.8)	0.9 (0.2, 1.6)	Bihar	Gaya
5	237	48.4 (43.3, 53.4)	45.9 (41.8, 49.9)	21.4 (17.8, 25.0)	1.4 (0.5, 2.3)	Bihar	Nawada
5	238	45.9 (40.7, 51.0)	47.2 (41.2, 53.1)	29.4 (24.0, 34.9)	1.3 (0.3, 2.3)	Bihar	Jamui
5	239	52.1 (46.9, 57.4)	47.1 (41.9, 52.2)	19.6 (15.8, 23.4)	0.8 (-0.1, 1.8)	Bihar	Jehanabad
5	240	50.2 (44.7, 55.7)	54.0 (49.5, 58.5)	30.7 (24.7, 36.7)	1.0 (0.3, 1.8)	Bihar	Arwal
8	494	37.3 (28.6, 45.9)	31.1 (21.7, 40.4)	17.1 (12.1, 22.0)	0.7 (-0.3, 1.7)	Dadra & Nagar Haveli and Daman & Diu	Diu
8	495	18.9 (12.4, 25.4)	25.2 (16.8, 33.6)	26.4 (17.3, 35.4)	2.5 (-1.4, 6.4)	Dadra & Nagar Haveli and Daman & Diu	Daman
8	496	41.7 (34.6, 48.8)	38.8 (34.0, 43.7)	27.6 (23.0, 32.2)	4.5 (1.6, 7.4)	Dadra & Nagar Haveli and Daman & Diu	Dadra & Nagar Haveli
10	585	21.4 (14.7, 28.1)	23.8 (17.3, 30.3)	17.5 (12.2, 22.8)	3.9 (0.0, 7.7)	Goa	North Goa
10	586	18.3 (12.4, 24.2)	23.9 (17.5, 30.3)	27.7 (17.5, 37.9)	3.5 (-0.8, 7.7)	Goa	South Goa
11	468	40.8 (33.2, 48.4)	39.0 (30.5, 47.4)	31.4 (20.4, 42.3)	1.6 (-0.0, 3.2)	Gujarat	Kachchh
11	469	40.7 (34.2, 47.1)	43.1 (36.9, 49.2)	21.6 (15.3, 27.9)	0.7 (-0.3, 1.7)	Gujarat	Banaskantha
11	470	37.6 (32.4, 42.8)	38.4 (32.0, 44.8)	24.5 (18.6, 30.4)	1.2 (-0.2, 2.6)	Gujarat	Patan
11	471	40.5 (34.1, 46.8)	41.9 (35.6, 48.1)	25.3 (17.7, 33.0)	1.3 (-0.0, 2.6)	Gujarat	Mahesena
11	472	50.6 (43.6, 57.5)	45.5 (38.5, 52.5)	23.5 (19.6, 27.4)	2.4 (0.7, 4.2)	Gujarat	Sabarkantha
11	473	36.4 (29.3, 43.6)	42.7 (34.1, 51.2)	29.0 (22.0, 36.1)	0.3 (-0.3, 1.0)	Gujarat	Gandhinagar
11	474	29.4 (23.4, 35.3)	31.0 (22.5, 39.5)	27.1 (20.2, 34.0)	1.9 (-0.8, 4.7)	Gujarat	Ahmedabad
11	475	45.5 (40.7, 50.4)	45.9 (40.3, 51.4)	27.7 (22.3, 33.2)	3.3 (1.0, 5.6)	Gujarat	Surendranagar
11	476	30.9 (25.3, 36.4)	31.4 (25.6, 37.2)	23.4 (18.3, 28.6)	2.2 (0.3, 4.2)	Gujarat	Rajkot
11	477	27.9 (20.6, 35.2)	29.3 (24.2, 34.3)	31.3 (22.1, 40.5)	3.2 (1.0, 5.4)	Gujarat	Jamnagar
11	478	22.6 (16.6, 28.6)	27.7 (22.1, 33.3)	25.4 (17.7, 33.0)	2.3 (0.2, 4.3)	Gujarat	Porbandar
11	479	27.9 (21.9, 33.9)	27.2 (19.4, 35.0)	30.4 (24.5, 36.3)	5.0 (2.3, 7.8)	Gujarat	Junagadh
11	480	37.8 (29.6, 46.0)	31.7 (22.2, 41.2)	24.6 (18.6, 30.5)	0.5 (-0.5, 1.5)	Gujarat	Amreli
11	481	48.4 (42.1, 54.7)	44.4 (36.7, 52.1)	26.0 (19.3, 32.6)	5.1 (1.8, 8.3)	Gujarat	Bhavnagar
11	482	48.2 (42.4, 54.0)	41.3 (33.4, 49.1)	21.7 (15.9, 27.4)	0.7 (-0.1, 1.5)	Gujarat	Anand
11	483	45.5 (38.8, 52.3)	48.1 (42.1, 54.1)	27.2 (21.3, 33.1)	0.3 (-0.2, 0.7)	Gujarat	Kheda
11	484	40.4 (34.3, 46.4)	42.3 (36.3, 48.3)	36.3 (30.9, 41.8)	0.3 (-0.3, 0.9)	Gujarat	Panchmahal
11	485	44.4 (39.2, 49.5)	50.8 (45.0, 56.7)	24.9 (20.5, 29.3)	0.5 (-0.2, 1.2)	Gujarat	Dohad
11	486	43.8 (38.4, 49.1)	39.1 (32.0, 46.3)	16.3 (11.4, 21.3)	2.0 (0.3, 3.7)	Gujarat	Vadodara
11	487	47.4 (40.4, 54.4)	53.6 (46.0, 61.3)	35.8 (29.6, 42.0)	1.0 (0.0, 2.0)	Gujarat	Narmada
11	488	41.5 (35.2, 47.7)	44.2 (38.5, 49.8)	29.4 (21.5, 37.3)	0.0 (0.0, 0.0)	Gujarat	Bharuch
11	489	48.1 (42.6, 53.5)	60.0 (53.5, 66.4)	43.0 (36.9, 49.1)	2.3 (0.2, 4.4)	Gujarat	The Dangs
11	490	38.9 (30.2, 47.6)	37.4 (28.8, 46.1)	26.8 (18.5, 35.1)	0.0 (0.0, 0.0)	Gujarat	Navsari
11	491	43.3 (33.1, 53.5)	41.9 (33.5, 50.2)	30.3 (22.8, 37.8)	3.9 (1.1, 6.7)	Gujarat	Valsad
11	492	30.0 (23.2, 36.7)	36.1 (30.0, 42.2)	26.2 (20.7, 31.8)	2.9 (0.9, 5.0)	Gujarat	Surat
11	493	35.9 (30.3, 41.5)	42.4 (33.8, 50.9)	35.8 (29.4, 42.2)	1.2 (-0.2, 2.5)	Gujarat	Tapi
13	23	29.9 (23.5, 36.3)	22.5 (15.3, 29.7)	15.0 (10.1, 19.9)	2.4 (0.2, 4.7)	Himachal Pradesh	Chamba
13	24	25.6 (17.8, 33.3)	23.3 (15.8, 30.8)	11.3 (7.5, 15.1)	1.0 (-0.4, 2.4)	Himachal Pradesh	Kangra
13	25	23.0 (15.8, 30.2)	16.0 (9.9, 22.2)	20.8 (12.9, 28.7)	5.0 (1.5, 8.6)	Himachal Pradesh	Lahul and Spiti
13	26	19.0 (13.6, 24.4)	11.0 (7.3, 14.6)	11.3 (7.0, 15.6)	2.5 (0.4, 4.6)	Himachal Pradesh	Kullu
13	27	26.3 (19.9, 32.7)	16.2 (10.0, 22.4)	13.1 (7.0, 19.1)	2.4 (0.5, 4.4)	Himachal Pradesh	Mandi
13	28	29.3 (23.8, 34.8)	19.4 (13.9, 24.8)	12.6 (7.3, 17.9)	3.3 (0.9, 5.8)	Himachal Pradesh	Hamirpur
13	29	22.6 (17.1, 28.0)	14.6 (9.8, 19.5)	10.7 (5.4, 16.0)	0.8 (-0.3, 2.0)	Himachal Pradesh	Una
13	30	27.2 (19.9, 34.5)	23.3 (16.3, 30.4)	13.1 (8.4, 17.9)	1.6 (-0.2, 3.4)	Himachal Pradesh	Bilaspur
13	31	27.6 (21.5, 33.8)	29.4 (21.6, 37.2)	17.5 (11.7, 23.4)	1.9 (0.2, 3.5)	Himachal Pradesh	Solan
13	32	23.5 (17.7, 29.2)	25.3 (20.6, 30.0)	19.5 (14.6, 24.4)	2.6 (0.7, 4.5)	Himachal Pradesh	Sirmaur
13	33	30.3 (19.3, 41.3)	24.8 (16.2, 33.4)	15.0 (8.8, 21.3)	1.7 (0.1, 3.2)	Himachal Pradesh	Shimla
13	34	18.4 (12.7, 24.1)	15.8 (10.5, 21.2)	12.4 (6.4, 18.3)	2.4 (0.2, 4.5)	Himachal Pradesh	Kinnaur
14	1	30.8 (24.7, 36.9)	14.3 (11.2, 17.5)	5.1 (2.6, 7.7)	2.4 (0.9, 3.9)	Jammu & Kashmir	Kupwara
14	2	20.4 (15.6, 25.2)	8.9 (5.0, 12.9)	4.2 (1.7, 6.7)	2.6 (0.7, 4.4)	Jammu & Kashmir	Badgam
14	5	27.6 (22.1, 33.2)	22.2 (16.4, 28.0)	17.7 (13.7, 21.7)	6.2 (3.6, 8.8)	Jammu & Kashmir	Punch
14	6	36.7 (30.6, 42.7)	22.8 (18.6, 27.0)	11.1 (7.7, 14.5)	7.8 (4.3, 11.4)	Jammu & Kashmir	Rajouri
14	7	31.5 (24.5, 38.4)	19.1 (14.9, 23.2)	15.3 (10.4, 20.1)	6.3 (3.1, 9.5)	Jammu & Kashmir	Kathua
14	8	28.6 (22.4, 34.7)	12.8 (6.9, 18.7)	14.5 (8.6, 20.4)	13.3 (8.2, 18.5)	Jammu & Kashmir	Baramula
14	9	20.5 (14.8, 26.2)	9.8 (5.3, 14.4)	6.2 (3.3, 9.1)	3.6 (1.8, 5.5)	Jammu & Kashmir	Bandipore
14	10	26.9 (17.8, 36.0)	23.2 (13.8, 32.5)	24.8 (14.9, 34.6)	9.0 (4.2, 13.8)	Jammu & Kashmir	Srinagar
14	11	24.4 (18.6, 30.1)	8.3 (5.3, 11.4)	4.6 (2.3, 6.9)	1.7 (0.2, 3.2)	Jammu & Kashmir	Ganderbal
14	12	22.7 (17.8, 27.7)	11.5 (6.2, 16.7)	10.4 (5.0, 15.8)	4.6 (2.2, 7.1)	Jammu & Kashmir	Pulwama
14	13	22.8 (16.4, 29.2)	11.1 (7.1, 15.1)	8.5 (3.4, 13.5)	6.3 (2.5, 10.1)	Jammu & Kashmir	Shupiyan
14	14	18.2 (12.9, 23.5)	8.2 (3.5, 12.9)	5.4 (2.4, 8.3)	4.3 (2.4, 6.1)	Jammu & Kashmir	Anantnag
14	15	20.9 (16.0, 25.7)	10.2 (6.7, 13.8)	7.4 (4.2, 10.6)	2.9 (0.4, 5.3)	Jammu & Kashmir	Kulgam
14	16	36.2 (29.6, 42.8)	18.8 (13.4, 24.2)	13.2 (8.1, 18.2)	6.3 (3.4, 9.3)	Jammu & Kashmir	Doda
14	17	33.6 (27.6, 39.6)	18.7 (14.8, 22.7)	16.2 (11.1, 21.4)	4.3 (1.7, 6.9)	Jammu & Kashmir	Ramban
14	18	29.3 (24.0, 34.6)	18.9 (13.1, 24.8)	16.3 (9.9, 22.7)	4.3 (1.5, 7.0)	Jammu & Kashmir	Kishtwar
14	19	43.1 (36.7, 49.5)	27.4 (20.9, 33.8)	13.2 (9.5, 16.9)	3.0 (1.0, 5.0)	Jammu & Kashmir	Udhampur
14	20	25.4 (20.3, 30.5)	22.7 (17.4, 28.0)	17.4 (13.5, 21.3)	0.7 (-0.1, 1.4)	Jammu & Kashmir	Reasi
14	21	23.2 (17.6, 28.9)	16.6 (10.2, 22.9)	13.7 (7.8, 19.6)	7.8 (3.8, 11.7)	Jammu & Kashmir	Jammu
14	22	19.6 (15.7, 23.5)	9.0 (5.9, 12.1)	5.2 (2.0, 8.5)	3.3 (1.1, 5.5)	Jammu & Kashmir	Samba
16	555	36.7 (30.1, 43.2)	38.5 (33.5, 43.6)	31.7 (25.4, 38.0)	2.4 (0.1, 4.8)	Karnataka	Belgaum
16	556	47.3 (41.4, 53.1)	44.6 (38.4, 50.8)	24.6 (19.4, 29.8)	2.3 (0.1, 4.6)	Karnataka	Bagalkot
16	557	44.9 (37.0, 52.8)	38.9 (32.0, 45.7)	29.1 (23.5, 34.8)	2.8 (0.6, 4.9)	Karnataka	Bijapur
16	558	42.8 (36.9, 48.8)	39.4 (33.6, 45.2)	23.6 (17.4, 29.8)	5.1 (2.5, 7.7)	Karnataka	Bidar
16	559	37.2 (29.5, 45.0)	41.2 (34.1, 48.2)	34.9 (27.5, 42.3)	2.6 (1.0, 4.3)	Karnataka	Raichur
16	560	55.7 (49.2, 62.3)	49.9 (42.7, 57.2)	26.3 (20.6, 32.1)	5.8 (0.8, 10.8)	Karnataka	Koppal
16	561	34.8 (23.2, 46.4)	38.1 (27.9, 48.4)	43.1 (35.4, 50.8)	4.3 (-0.9, 9.6)	Karnataka	Gadag
16	562	37.3 (31.3, 43.4)	41.1 (34.4, 47.8)	33.7 (27.7, 39.8)	2.8 (0.2, 5.5)	Karnataka	Dharwad
16	563	37.9 (30.3, 45.6)	30.1 (23.7, 36.6)	18.3 (11.2, 25.3)	1.0 (-0.4, 2.5)	Karnataka	Uttara Kannada
16	564	43.8 (36.4, 51.2)	36.9 (29.8, 44.1)	20.4 (15.0, 25.8)	3.1 (1.0, 5.2)	Karnataka	Haveri
16	565	49.5 (43.4, 55.5)	53.3 (46.2, 60.4)	26.9 (20.4, 33.3)	1.4 (-0.2, 3.0)	Karnataka	Bellary
16	566	28.6 (19.8, 37.3)	29.9 (20.2, 39.5)	31.8 (22.9, 40.7)	1.2 (-0.4, 2.9)	Karnataka	Chitradurga
16	567	46.3 (37.7, 55.0)	41.9 (33.9, 49.9)	22.4 (17.4, 27.4)	1.8 (-0.5, 4.1)	Karnataka	Davanagere
16	568	35.3 (29.1, 41.5)	30.6 (23.9, 37.4)	14.3 (9.5, 19.1)	0.6 (-0.6, 1.9)	Karnataka	Shimoga
16	569	21.1 (15.7, 26.5)	22.3 (15.3, 29.4)	20.9 (15.9, 25.9)	1.2 (-0.4, 2.9)	Karnataka	Udupi
16	570	21.1 (15.4, 26.9)	24.6 (16.6, 32.6)	22.3 (15.2, 29.3)	0.9 (-0.3, 2.1)	Karnataka	Chikmagalur
16	571	28.6 (21.4, 35.8)	26.0 (18.9, 33.0)	26.2 (19.1, 33.3)	3.2 (0.2, 6.3)	Karnataka	Tumkur
16	572	28.1 (19.9, 36.3)	26.8 (18.7, 34.9)	28.9 (20.4, 37.4)	3.5 (0.9, 6.1)	Karnataka	Bangalore
16	573	18.6 (12.5, 24.7)	20.3 (14.6, 26.0)	23.2 (16.3, 30.0)	1.4 (-0.2, 3.0)	Karnataka	Mandya
16	574	27.0 (19.7, 34.3)	26.4 (20.1, 32.7)	19.1 (13.6, 24.5)	0.6 (-0.6, 1.8)	Karnataka	Hassan
16	575	23.9 (18.6, 29.2)	21.7 (16.8, 26.6)	17.1 (11.6, 22.7)	1.1 (-0.4, 2.7)	Karnataka	Dakshina Kannada
16	576	29.8 (23.6, 36.1)	25.7 (19.3, 32.1)	16.4 (11.1, 21.6)	3.1 (0.4, 5.8)	Karnataka	Kodagu
16	577	25.1 (19.3, 30.8)	24.9 (18.2, 31.6)	17.3 (10.9, 23.7)	3.0 (0.1, 5.9)	Karnataka	Mysore
16	578	30.4 (24.2, 36.7)	31.1 (23.6, 38.6)	19.1 (11.9, 26.3)	1.8 (-0.2, 3.8)	Karnataka	Chamarajanagar
16	579	52.2 (45.2, 59.1)	56.6 (48.6, 64.7)	34.0 (27.5, 40.6)	1.3 (0.2, 2.4)	Karnataka	Gulbarga
16	580	55.5 (48.2, 62.8)	50.3 (43.0, 57.6)	31.3 (24.1, 38.4)	4.4 (2.3, 6.6)	Karnataka	Yadgir
16	581	32.0 (24.5, 39.5)	27.7 (22.8, 32.7)	18.4 (13.5, 23.3)	1.8 (-0.1, 3.7)	Karnataka	Kolar
16	582	37.7 (29.9, 45.5)	28.5 (20.5, 36.5)	17.2 (10.9, 23.5)	4.6 (0.1, 9.1)	Karnataka	Chikkaballapura
16	583	28.6 (24.2, 33.1)	26.5 (21.5, 31.4)	22.8 (17.8, 27.8)	3.7 (1.4, 6.1)	Karnataka	Bangalore Rural
16	584	22.0 (11.9, 32.2)	22.9 (13.2, 32.6)	20.3 (13.3, 27.3)	1.2 (-1.1, 3.5)	Karnataka	Ramanagara
17	588	18.7 (13.7, 23.6)	13.9 (10.6, 17.1)	9.7 (5.4, 14.0)	0.4 (-0.4, 1.2)	Kerala	Kasaragod
17	589	25.3 (17.4, 33.2)	10.5 (6.0, 15.0)	10.2 (5.0, 15.3)	6.7 (1.7, 11.7)	Kerala	Kannur
17	590	27.7 (21.2, 34.1)	27.2 (19.8, 34.6)	23.9 (15.9, 31.9)	1.6 (-0.3, 3.4)	Kerala	Wayanad
17	591	18.0 (12.3, 23.8)	18.5 (11.6, 25.4)	13.5 (7.9, 19.1)	7.4 (0.2, 14.6)	Kerala	Kozhikode
17	592	26.3 (19.8, 32.9)	17.3 (12.3, 22.3)	22.3 (15.5, 29.1)	3.2 (0.6, 5.8)	Kerala	Malappuram
17	593	20.2 (13.8, 26.6)	19.1 (12.2, 26.0)	10.3 (5.1, 15.5)	0.8 (-0.3, 2.0)	Kerala	Palakkad
17	594	20.8 (13.9, 27.8)	14.0 (9.1, 19.0)	15.3 (8.4, 22.1)	3.5 (-0.6, 7.5)	Kerala	Thrissur
17	595	12.4 (6.1, 18.8)	12.0 (6.2, 17.9)	15.9 (9.1, 22.6)	1.3 (-0.6, 3.3)	Kerala	Ernakulam
17	596	15.1 (9.3, 20.8)	14.8 (7.9, 21.8)	24.2 (15.9, 32.5)	4.7 (0.4, 8.9)	Kerala	Idukki
17	597	22.0 (15.8, 28.2)	11.3 (5.8, 16.7)	16.2 (9.4, 23.0)	3.7 (0.2, 7.2)	Kerala	Kottayam
17	598	14.5 (8.6, 20.4)	17.2 (10.4, 23.9)	16.6 (10.6, 22.6)	4.0 (0.9, 7.0)	Kerala	Alappuzha
17	599	13.2 (6.8, 19.7)	11.4 (5.1, 17.7)	14.4 (8.9, 19.9)	3.3 (0.1, 6.4)	Kerala	Pathanamthitta
17	600	14.4 (7.2, 21.7)	14.2 (8.7, 19.7)	18.8 (11.2, 26.4)	3.8 (1.2, 6.4)	Kerala	Kollam
17	601	19.5 (11.9, 27.1)	21.5 (15.6, 27.5)	13.1 (7.2, 19.0)	3.5 (0.5, 6.5)	Kerala	Thiruvananthapuram
18	587	26.8 (22.1, 31.6)	23.6 (18.8, 28.3)	13.7 (10.2, 17.3)	1.6 (0.3, 3.0)	NA	NA
20	497	47.6 (40.2, 54.9)	55.4 (47.8, 63.0)	39.8 (33.1, 46.4)	2.3 (0.1, 4.6)	Maharashtra	Nandurbar
20	498	39.6 (31.1, 48.2)	47.5 (39.4, 55.7)	30.3 (24.5, 36.0)	2.1 (0.6, 3.5)	Maharashtra	Dhule
20	499	36.4 (25.7, 47.2)	36.4 (27.0, 45.7)	32.5 (26.2, 38.7)	1.0 (-0.4, 2.4)	Maharashtra	Jalgaon
20	500	43.9 (36.4, 51.4)	41.3 (34.8, 47.8)	21.1 (16.8, 25.4)	2.0 (0.1, 3.8)	Maharashtra	Buldhana
20	501	41.2 (35.4, 47.0)	39.3 (34.3, 44.2)	22.7 (17.5, 27.9)	2.0 (0.4, 3.5)	Maharashtra	Akola
20	502	41.1 (34.3, 47.8)	42.9 (35.9, 49.9)	32.5 (25.0, 39.9)	3.7 (1.6, 5.8)	Maharashtra	Washim
20	503	38.1 (28.8, 47.3)	33.0 (24.6, 41.5)	24.7 (17.6, 31.7)	1.7 (-0.2, 3.6)	Maharashtra	Amravati
20	504	30.5 (21.7, 39.3)	36.1 (28.1, 44.1)	26.2 (17.6, 34.7)	2.3 (0.5, 4.1)	Maharashtra	Wardha
20	505	33.9 (27.4, 40.4)	33.6 (26.2, 41.1)	25.6 (20.0, 31.3)	1.0 (-0.4, 2.4)	Maharashtra	Nagpur
20	506	40.5 (29.1, 51.9)	32.5 (24.8, 40.3)	16.2 (8.6, 23.7)	3.2 (0.5, 5.8)	Maharashtra	Bhandara
20	507	34.7 (27.8, 41.6)	40.1 (33.2, 46.9)	29.7 (23.7, 35.6)	0.7 (-0.2, 1.7)	Maharashtra	Gondiya
20	508	32.5 (23.9, 41.0)	42.1 (32.3, 51.8)	45.8 (35.9, 55.7)	0.7 (-0.6, 1.9)	Maharashtra	Gadchiroli
20	509	32.2 (24.6, 39.8)	40.3 (32.2, 48.4)	31.3 (23.8, 38.7)	3.0 (1.0, 5.1)	Maharashtra	Chandrapur
20	510	47.4 (39.2, 55.6)	49.1 (42.5, 55.6)	28.8 (21.5, 36.2)	3.7 (1.2, 6.2)	Maharashtra	Yavatmal
20	511	40.4 (33.8, 47.1)	34.4 (27.3, 41.5)	20.1 (15.4, 24.7)	2.5 (0.9, 4.0)	Maharashtra	Nanded
20	512	39.6 (33.9, 45.4)	36.9 (31.3, 42.4)	24.2 (18.4, 30.0)	2.1 (0.4, 3.7)	Maharashtra	Hingoli
20	513	46.4 (38.9, 53.9)	42.2 (36.7, 47.8)	19.8 (15.5, 24.1)	1.0 (-0.0, 2.0)	Maharashtra	Parbhani
20	514	44.1 (38.1, 50.1)	43.6 (37.3, 49.8)	22.4 (17.0, 27.8)	2.0 (0.0, 4.0)	Maharashtra	Jalna
20	515	38.6 (31.9, 45.3)	36.0 (31.3, 40.7)	20.8 (16.0, 25.6)	1.7 (-0.1, 3.5)	Maharashtra	Aurangabad
20	516	43.5 (37.9, 49.0)	42.9 (35.1, 50.8)	32.0 (26.8, 37.3)	0.4 (-0.1, 1.0)	Maharashtra	Nashik
20	517	38.5 (31.7, 45.2)	40.3 (32.9, 47.6)	29.2 (21.0, 37.4)	1.1 (-0.2, 2.3)	Maharashtra	Thane
20	518	21.3 (14.5, 28.1)	28.9 (19.6, 38.1)	20.3 (13.2, 27.4)	2.7 (-0.1, 5.6)	Maharashtra	Mumbai Suburban
20	519	25.5 (14.3, 36.6)	22.7 (12.0, 33.4)	25.8 (17.3, 34.2)	4.4 (0.6, 8.2)	Maharashtra	Mumbai
20	520	29.9 (22.3, 37.5)	38.6 (31.8, 45.4)	28.9 (22.3, 35.4)	1.2 (-0.1, 2.5)	Maharashtra	Raigarh
20	521	22.4 (13.7, 31.0)	25.6 (19.0, 32.1)	23.4 (15.4, 31.3)	2.9 (0.2, 5.6)	Maharashtra	Pune
20	522	33.4 (28.6, 38.3)	31.1 (24.5, 37.8)	21.7 (16.4, 27.0)	2.1 (0.5, 3.7)	Maharashtra	Ahmednagar
20	523	37.8 (31.3, 44.3)	36.9 (31.1, 42.6)	29.5 (23.4, 35.6)	2.7 (0.8, 4.6)	Maharashtra	Bid
20	524	34.7 (29.6, 39.7)	34.5 (29.6, 39.3)	22.4 (16.5, 28.4)	2.8 (0.8, 4.9)	Maharashtra	Latur
20	525	43.3 (37.5, 49.1)	44.5 (38.8, 50.2)	21.9 (15.9, 27.8)	2.2 (0.2, 4.2)	Maharashtra	Osmanabad
20	526	25.4 (21.3, 29.6)	34.6 (26.5, 42.6)	24.1 (18.8, 29.4)	2.6 (0.2, 4.9)	Maharashtra	Solapur
20	527	23.3 (18.6, 28.0)	27.8 (20.9, 34.6)	23.5 (16.6, 30.5)	1.2 (-0.2, 2.6)	Maharashtra	Satara
20	528	28.3 (18.2, 38.3)	28.9 (18.8, 38.9)	22.3 (13.6, 31.0)	3.5 (-0.2, 7.3)	Maharashtra	Ratnagiri
20	529	25.9 (18.9, 32.9)	25.2 (18.6, 31.9)	19.6 (13.0, 26.1)	1.4 (-0.6, 3.4)	Maharashtra	Sindhudurg
20	530	26.9 (18.5, 35.2)	31.2 (24.0, 38.4)	25.7 (17.7, 33.6)	1.1 (-0.4, 2.6)	Maharashtra	Kolhapur
20	531	23.3 (15.8, 30.7)	24.8 (16.7, 32.8)	17.5 (12.9, 22.2)	1.2 (-0.2, 2.6)	Maharashtra	Sangli
21	272	34.9 (29.4, 40.4)	14.7 (11.2, 18.3)	8.2 (4.9, 11.5)	6.2 (3.8, 8.7)	Manipur	Senapati
21	273	37.1 (31.3, 42.8)	16.3 (12.7, 19.9)	8.2 (6.0, 10.3)	4.0 (1.6, 6.3)	Manipur	Tamenglong
21	274	35.7 (28.6, 42.8)	11.3 (7.6, 14.9)	6.6 (4.0, 9.1)	3.1 (1.0, 5.1)	Manipur	Churachandpur
21	275	24.7 (21.5, 27.9)	13.7 (11.5, 15.9)	6.9 (4.9, 8.9)	2.1 (1.0, 3.2)	Manipur	Bishnupur
21	276	30.1 (25.6, 34.6)	17.8 (13.7, 22.0)	7.0 (5.5, 8.6)	3.1 (1.7, 4.5)	Manipur	Thoubal
21	277	21.0 (16.8, 25.1)	8.4 (5.9, 10.9)	4.7 (2.7, 6.6)	3.0 (1.6, 4.3)	Manipur	Imphal West
21	278	26.2 (22.4, 30.0)	17.1 (13.5, 20.8)	7.8 (5.5, 10.0)	1.5 (0.7, 2.3)	Manipur	Imphal East
21	279	32.7 (28.0, 37.3)	11.1 (8.0, 14.2)	7.2 (4.3, 10.0)	3.5 (1.8, 5.3)	Manipur	Ukhrul
21	280	36.1 (30.2, 42.0)	13.2 (9.0, 17.3)	7.5 (4.4, 10.7)	4.1 (2.2, 6.0)	Manipur	Chandel
22	293	30.6 (23.6, 37.6)	26.0 (18.9, 33.0)	21.5 (16.1, 26.9)	4.5 (2.1, 6.8)	Meghalaya	West Garo Hills
22	294	31.0 (26.3, 35.7)	18.2 (13.3, 23.1)	13.3 (9.9, 16.7)	7.8 (4.9, 10.7)	Meghalaya	East Garo Hills
22	295	16.8 (11.7, 21.9)	32.6 (26.8, 38.3)	36.0 (29.4, 42.6)	1.7 (0.1, 3.4)	Meghalaya	South Garo Hills
22	296	51.1 (44.4, 57.8)	30.3 (25.8, 34.8)	17.2 (12.2, 22.2)	3.5 (1.8, 5.2)	Meghalaya	West Khasi Hills
22	297	51.6 (47.5, 55.6)	30.8 (26.5, 35.2)	9.4 (6.5, 12.2)	4.9 (2.6, 7.1)	Meghalaya	Ribhoi
22	298	48.6 (44.7, 52.5)	30.4 (27.0, 33.8)	11.1 (8.9, 13.3)	2.9 (1.7, 4.1)	Meghalaya	East Khasi Hills
22	299	50.8 (45.9, 55.7)	34.0 (29.8, 38.1)	15.8 (12.0, 19.5)	2.5 (1.2, 3.9)	Meghalaya	Jaintia Hills
23	281	30.8 (24.2, 37.3)	17.5 (11.9, 23.1)	9.3 (6.3, 12.4)	3.1 (1.1, 5.0)	Mizoram	Mamit
23	282	26.3 (22.1, 30.4)	11.4 (8.1, 14.7)	6.6 (4.1, 9.0)	3.7 (1.9, 5.4)	Mizoram	Kolasib
23	283	23.7 (17.7, 29.7)	6.7 (3.6, 9.8)	2.3 (0.8, 3.8)	5.6 (2.8, 8.4)	Mizoram	Aizawl
23	284	32.9 (28.7, 37.1)	12.7 (9.7, 15.8)	6.0 (4.4, 7.6)	3.8 (2.5, 5.2)	Mizoram	Champhai
23	285	25.4 (20.8, 29.9)	12.2 (9.2, 15.3)	9.4 (6.7, 12.2)	3.4 (1.9, 4.9)	Mizoram	Serchhip
23	286	25.3 (21.2, 29.4)	13.1 (9.7, 16.5)	6.1 (3.4, 8.8)	3.2 (1.9, 4.5)	Mizoram	Lunglei
23	287	35.3 (29.2, 41.4)	21.3 (14.9, 27.7)	12.0 (6.9, 17.1)	2.5 (0.5, 4.4)	Mizoram	Lawngtlai
23	288	37.5 (32.2, 42.7)	16.6 (13.5, 19.8)	11.6 (8.9, 14.3)	4.2 (2.1, 6.2)	Mizoram	Saiha
24	261	35.8 (29.8, 41.8)	24.5 (17.9, 31.1)	21.3 (14.9, 27.7)	7.2 (4.3, 10.0)	Nagaland	Mon
24	262	19.8 (13.5, 26.2)	5.7 (0.3, 11.2)	1.8 (-0.3, 3.8)	2.0 (-0.9, 4.8)	Nagaland	Mokokchung
24	263	31.1 (22.7, 39.4)	13.7 (9.8, 17.5)	9.5 (6.2, 12.7)	3.7 (1.1, 6.3)	Nagaland	Zunheboto
24	264	18.0 (12.0, 24.0)	11.8 (5.5, 18.2)	12.7 (6.4, 18.9)	2.1 (0.1, 4.0)	Nagaland	Wokha
24	265	21.3 (17.8, 24.8)	14.9 (11.9, 17.9)	8.1 (5.7, 10.5)	2.6 (1.2, 4.0)	Nagaland	Dimapur
24	266	27.8 (21.6, 33.9)	12.8 (8.8, 16.9)	6.7 (4.0, 9.5)	4.8 (2.3, 7.3)	Nagaland	Phek
24	267	35.5 (30.2, 40.8)	20.2 (15.4, 25.1)	11.8 (8.1, 15.5)	2.8 (0.9, 4.7)	Nagaland	Tuensang
24	268	26.0 (19.9, 32.2)	17.1 (12.2, 22.0)	16.3 (10.8, 21.8)	6.2 (2.5, 9.9)	Nagaland	Longleng
24	269	41.8 (34.1, 49.4)	25.6 (20.2, 31.1)	13.9 (7.7, 20.1)	1.7 (0.6, 2.8)	Nagaland	Kiphire
24	270	24.7 (20.4, 29.0)	15.2 (11.8, 18.6)	11.7 (8.0, 15.5)	4.9 (2.7, 7.1)	Nagaland	Kohima
24	271	29.7 (23.2, 36.3)	10.3 (5.9, 14.7)	4.1 (1.7, 6.5)	0.5 (-0.1, 1.2)	Nagaland	Peren
30	241	24.1 (16.4, 31.8)	17.9 (10.2, 25.6)	19.3 (12.2, 26.4)	9.2 (4.3, 14.1)	Sikkim	North District
30	242	42.2 (34.2, 50.3)	14.7 (6.5, 22.9)	14.5 (7.5, 21.5)	10.8 (4.4, 17.3)	Sikkim	West District
30	243	32.8 (23.3, 42.3)	20.5 (13.8, 27.3)	18.5 (9.9, 27.0)	12.1 (7.0, 17.2)	Sikkim	South District
30	244	24.0 (19.5, 28.4)	11.2 (7.5, 14.8)	11.9 (8.2, 15.5)	6.2 (3.6, 8.9)	Sikkim	East District
32	289	19.5 (15.4, 23.7)	19.0 (14.7, 23.3)	14.2 (10.7, 17.8)	4.7 (2.5, 7.0)	Tripura	West Tripura
32	290	25.0 (19.1, 30.9)	25.8 (20.0, 31.7)	21.5 (15.0, 28.1)	2.1 (-0.3, 4.5)	Tripura	South Tripura
32	291	32.5 (26.3, 38.7)	27.2 (20.8, 33.6)	23.3 (18.2, 28.3)	3.2 (0.5, 6.0)	Tripura	Dhalai
32	292	29.0 (22.0, 35.9)	30.7 (23.8, 37.6)	14.8 (10.2, 19.5)	0.3 (-0.3, 0.9)	Tripura	North Tripura
35	327	29.1 (21.4, 36.8)	25.7 (16.6, 34.7)	11.3 (5.6, 17.1)	4.1 (1.4, 6.8)	West Bengal	Darjeeling
35	328	31.2 (24.9, 37.4)	24.6 (19.6, 29.7)	17.7 (12.8, 22.6)	3.9 (1.2, 6.5)	West Bengal	Jalpaiguri
35	329	32.9 (24.6, 41.3)	29.3 (22.6, 36.0)	20.1 (13.5, 26.6)	2.6 (0.7, 4.5)	West Bengal	Koch Bihar
35	330	40.4 (33.1, 47.6)	34.7 (28.5, 40.9)	14.0 (10.2, 17.8)	2.0 (0.6, 3.3)	West Bengal	Uttar Dinajpur
35	331	32.9 (24.2, 41.6)	28.1 (21.2, 34.9)	17.1 (11.8, 22.3)	4.4 (0.3, 8.5)	West Bengal	Dakshin Dinajpur
35	332	37.8 (32.2, 43.4)	37.2 (32.3, 42.0)	22.8 (16.1, 29.5)	0.9 (-0.7, 2.5)	West Bengal	Maldah
35	333	41.9 (35.4, 48.4)	34.6 (26.5, 42.8)	17.5 (13.3, 21.7)	2.4 (0.5, 4.2)	West Bengal	Murshidabad
35	334	40.5 (33.2, 47.8)	43.1 (35.7, 50.6)	29.5 (22.5, 36.4)	1.3 (-0.2, 2.8)	West Bengal	Birbhum
35	335	32.5 (25.9, 39.0)	33.7 (26.8, 40.7)	25.8 (20.6, 31.1)	2.7 (0.5, 4.9)	West Bengal	Barddhaman
35	336	23.3 (18.0, 28.6)	19.3 (13.5, 25.2)	10.7 (6.8, 14.6)	1.4 (-0.1, 2.9)	West Bengal	Nadia
35	337	23.8 (18.0, 29.6)	18.3 (12.4, 24.2)	13.6 (8.6, 18.7)	3.1 (0.4, 5.8)	West Bengal	North Twenty Four Parganas
35	338	30.1 (23.7, 36.5)	28.7 (21.7, 35.6)	18.5 (12.3, 24.8)	3.0 (0.6, 5.4)	West Bengal	Hugli
35	339	34.0 (27.3, 40.8)	39.8 (32.2, 47.3)	27.0 (20.4, 33.6)	1.2 (-0.1, 2.4)	West Bengal	Bankura
35	340	45.5 (37.2, 53.9)	58.2 (51.5, 64.9)	34.6 (29.3, 39.9)	1.1 (0.0, 2.1)	West Bengal	Puruliya
35	341	34.6 (27.2, 42.1)	28.4 (22.4, 34.3)	14.6 (9.4, 19.7)	1.9 (-0.0, 3.8)	West Bengal	Haora
35	342	24.2 (13.7, 34.7)	19.6 (13.1, 26.0)	17.4 (11.4, 23.3)	5.1 (0.8, 9.4)	West Bengal	Kolkata
35	343	27.3 (20.7, 33.9)	27.8 (22.6, 33.1)	20.1 (14.0, 26.1)	0.6 (-0.2, 1.4)	West Bengal	South Twenty Four Parganas
35	344	29.4 (23.6, 35.2)	40.3 (34.6, 46.0)	28.0 (22.5, 33.5)	2.0 (0.3, 3.6)	West Bengal	Paschim Medinipur
35	345	29.9 (23.9, 35.8)	32.8 (27.4, 38.2)	24.5 (19.0, 30.0)	1.0 (-0.3, 2.3)	West Bengal	Purba Medinipur
36	532	38.2 (28.5, 48.0)	35.8 (27.9, 43.7)	22.1 (16.6, 27.5)	1.0 (-0.3, 2.3)	Telangana	Adilabad
36	533	36.6 (29.3, 43.8)	36.3 (30.0, 42.5)	22.0 (15.7, 28.3)	0.4 (-0.4, 1.3)	Telangana	Nizamabad
36	534	24.3 (16.9, 31.7)	25.4 (20.1, 30.7)	19.3 (13.3, 25.4)	0.9 (-0.4, 2.2)	Telangana	Karimnagar
36	535	33.4 (26.7, 40.2)	37.0 (28.7, 45.4)	20.7 (15.2, 26.3)	0.0 (0.0, 0.0)	Telangana	Medak
36	536	16.4 (7.7, 25.2)	17.2 (7.8, 26.6)	15.0 (8.0, 21.9)	2.4 (-1.7, 6.5)	Telangana	Hyderabad
36	537	26.2 (19.4, 32.9)	25.8 (18.0, 33.5)	14.8 (10.2, 19.5)	0.0 (0.0, 0.0)	Telangana	Rangareddy
36	538	37.0 (30.2, 43.9)	34.5 (26.5, 42.4)	18.6 (13.5, 23.8)	0.4 (-0.4, 1.1)	Telangana	Mahbubnagar
36	539	28.9 (22.0, 35.9)	34.1 (27.7, 40.5)	23.1 (17.4, 28.8)	0.0 (0.0, 0.0)	Telangana	Nalgonda
36	540	26.6 (18.7, 34.5)	29.1 (22.8, 35.3)	16.6 (11.3, 21.9)	1.2 (-0.4, 2.8)	Telangana	Warangal
36	541	26.5 (21.7, 31.3)	22.2 (17.1, 27.3)	13.7 (8.7, 18.6)	0.0 (0.0, 0.0)	Telangana	Khammam
37	3	20.6 (14.0, 27.2)	16.8 (10.3, 23.3)	12.3 (6.8, 17.9)	4.0 (1.3, 6.7)	Ladakh	Leh(Ladakh)
37	4	39.6 (33.3, 45.8)	20.3 (15.3, 25.3)	6.8 (4.0, 9.6)	4.0 (1.9, 6.0)	Ladakh	Kargil

## Sheet: Annualized National
outcome	diff_mean_4v3	diff_mean_5v4	diff_se_4v3	diff_se_5v4	diff_lci_4v3	diff_uci_4v3	diff_lci_5v4	diff_uci_5v4	change_4v3	change_5v4	z_diff_change
stunting	-1.09873	-0.261251	0.0817161	0.0963412	-1.25889	-0.938568	-0.45008	-0.0724227	-1.1 (-1.3, -0.9)	-0.3 (-0.5, -0.1)	-6.62933
underweight	-0.702248	-0.196118	0.0825322	0.0951546	-0.864011	-0.540485	-0.382621	-0.00961464	-0.7 (-0.9, -0.5)	-0.2 (-0.4, -0.0)	-4.01818
wasting	0.256959	0.115725	0.0559104	0.0816515	0.147375	0.366543	-0.0443122	0.275762	0.3 (0.1, 0.4)	0.1 (-0.0, 0.3)	1.42719
overweight	0.0304806	0.48262	0.0170137	0.0253207	-0.00286624	0.0638274	0.432992	0.532249	0.0 (-0.0, 0.1)	0.5 (0.4, 0.5)	-14.8214

## Sheet: Annualized Rural
outcome	diff_mean_4v3	diff_mean_5v4	diff_se_4v3	diff_se_5v4	diff_lci_4v3	diff_uci_4v3	diff_lci_5v4	diff_uci_5v4	change_4v3	change_5v4	z_diff_change
stunting	-1.06937	-0.525038	0.0956096	0.103776	-1.25676	-0.881975	-0.728439	-0.321637	-1.1 (-1.3, -0.9)	-0.5 (-0.7, -0.3)	-3.85764
underweight	-0.795353	-0.362558	0.0982683	0.101227	-0.987959	-0.602747	-0.560962	-0.164153	-0.8 (-1.0, -0.6)	-0.4 (-0.6, -0.2)	-3.06773
wasting	0.146564	0.123591	0.0679275	0.0872088	0.0134256	0.279702	-0.0473387	0.29452	0.1 (0.0, 0.3)	0.1 (-0.0, 0.3)	0.207821
overweight	0.0596245	0.432732	0.0166011	0.0239006	0.0270863	0.0921626	0.385887	0.479577	0.1 (0.0, 0.1)	0.4 (0.4, 0.5)	-12.8214

## Sheet: Annualized Urban
outcome	diff_mean_4v3	diff_mean_5v4	diff_se_4v3	diff_se_5v4	diff_lci_4v3	diff_uci_4v3	diff_lci_5v4	diff_uci_5v4	change_4v3	change_5v4	z_diff_change
stunting	-1.07256	0.714657	0.145607	0.218163	-1.35795	-0.787169	0.287056	1.14226	-1.1 (-1.4, -0.8)	0.7 (0.3, 1.1)	-6.81386
underweight	-0.336832	0.413281	0.137066	0.218532	-0.605482	-0.0681833	-0.0150425	0.841605	-0.3 (-0.6, -0.1)	0.4 (-0.0, 0.8)	-2.90786
wasting	0.588736	0.0144003	0.0937698	0.187312	0.404947	0.772525	-0.352731	0.381532	0.6 (0.4, 0.8)	0.0 (-0.4, 0.4)	2.74182
overweight	-0.0618478	0.602981	0.0442042	0.0666449	-0.148488	0.0247925	0.472357	0.733605	-0.1 (-0.1, 0.0)	0.6 (0.5, 0.7)	-8.31325
